# Supplementary material
Source: PubMed Central journal article supplement (PMC5438758)

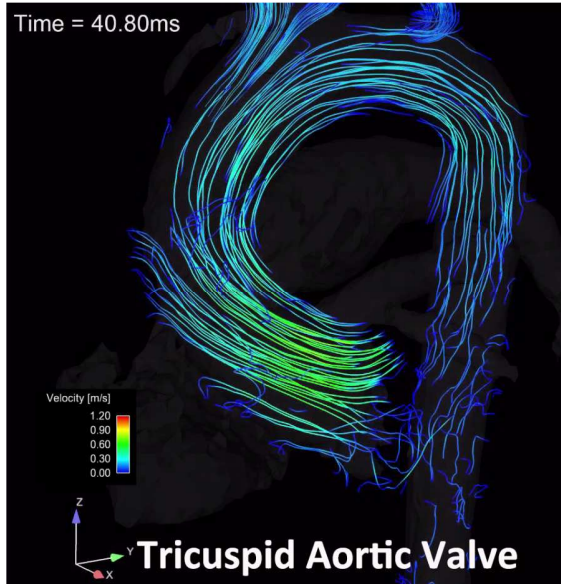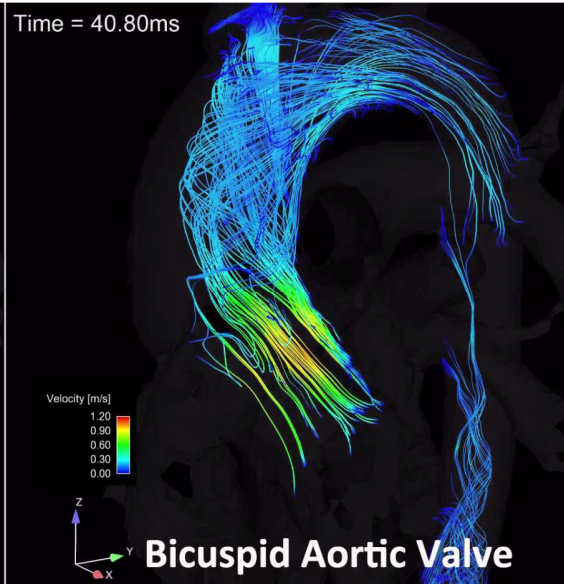

Supplement: NIHMS857445-supplement-supplement_1.pdf [file NIHMS857445-supplement-supplement_1.pdf]
